# Supplementary material for: Exposure of Female Rats to an Environmentally Relevant Mixture of Brominated Flame Retardants Targets the Ovary, Affecting Folliculogenesis and Steroidogenesis
Source: PubMed Central journal article supplement — Biol Reprod. 2015 Nov 25;94(1):9. doi: 10.1095/biolreprod.115.134452 (PMC4809562; doi:10.1095/biolreprod.115.134452), 2015-11-25
Supplement: supp_115.134452_biolreprod.115.134452-1.pdf [file supp_115.134452_biolreprod.115.134452-1.pdf]

**Lefevre et al., Supplemental Table S1.** Genes selected for PCR array analysis and specific to ovarian functions.

| Gene Symbol             | Gene Name                                                                    | RefSeq NB    | Tagman Assay  |
|-------------------------|------------------------------------------------------------------------------|--------------|---------------|
| <a href="#">Ar</a>      | androgen receptor                                                            | NM_012502    | Rn00560747_m1 |
| <a href="#">Arh</a>     | aryl hydrocarbon receptor                                                    | NM_013149    | Rn00565750_m1 |
| <a href="#">Arnt</a>    | aryl hydrocarbon receptor nuclear translocator                               | NM_012780    | Rn00562847_m1 |
| <a href="#">Bax</a>     | Bcl2-associated X protein                                                    | NM_017059    | Rn02532082_g1 |
| <a href="#">Bcl2</a>    | B-cell CLL/lymphoma 2                                                        | NM_016993    | Rn99999125_m1 |
| <a href="#">Bmp4</a>    | bone morphogenetic protein 4                                                 | NM_012827    | Rn00432087_m1 |
| <a href="#">Bmp7</a>    | bone morphogenetic protein 7                                                 | NM_001191856 | Rn01528889_m1 |
| <a href="#">Casp2</a>   | caspase 2                                                                    | NM_022522    | Rn00574684_m1 |
| <a href="#">Ccnd2</a>   | cyclin D2                                                                    | NM_022267    | Rn03020897_m1 |
| <a href="#">Cmklr1</a>  | chemokine-like receptor 1                                                    | NM_022218    | Rn00573616_s1 |
| <a href="#">Cx43</a>    | gap junction protein, alpha 1                                                | NM_012567    | Rn01433957_m1 |
| <a href="#">Cyp11a1</a> | cytochrome P450, family 11, subfamily a, polypeptide 1                       | NM_017286    | Rn00568733_m1 |
| <a href="#">Cyp17a1</a> | cytochrome P450, family 17, subfamily a, polypeptide 1                       | NM_012753    | Rn00562601_m1 |
| <a href="#">Cyp19</a>   | aromatase                                                                    | NM_017085    | Rn01422546_m1 |
| <a href="#">Esr1</a>    | estrogen receptor 1 (ER alpha)                                               | NM_012689    | Rn01640372_m1 |
| <a href="#">Esr2</a>    | estrogen receptor 2 (ER beta)                                                | NM_012754    | Rn00562610_m1 |
| <a href="#">Foxo3a</a>  | forkhead box O3                                                              | NM_001106395 | Rn01441087_m1 |
| <a href="#">Fshr</a>    | follicle stimulating hormone receptor                                        | NM_199237    | Rn01648507_m1 |
| <a href="#">Gdf9</a>    | growth differentiation factor 9                                              | NM_021672    | Rn00572328_m1 |
| <a href="#">Gzma</a>    | granzyme A                                                                   | NM_153468    | Rn00596401_m1 |
| <a href="#">Gzmb</a>    | granzyme B                                                                   | NM_138517    | Rn00821752_g1 |
| <a href="#">Hsd17b1</a> | hydroxysteroid (17-beta) dehydrogenase 1                                     | NM_012851    | Rn00563388_g1 |
| <a href="#">Hsd3b1</a>  | hydroxy-delta-5-steroid dehydrogenase, 3 beta- and steroid delta-isomerase 1 | NM_001007719 | Rn01774741_m1 |
| <a href="#">Igf1</a>    | insulin-like growth factor                                                   | NM_178866    | Rn00710306_m1 |
| <a href="#">Insl3</a>   | insulin-like 3                                                               | NM_053680    | Rn00586632_m1 |
| <a href="#">Kitlg</a>   | KIT ligand                                                                   | NM_021843    | Rn01502851_m1 |
| <a href="#">Lfn3</a>    | O-fucosylpeptide 3-beta-N-acetylglucosaminyltransferase                      | NM_133393    | Rn00591325_m1 |
| <a href="#">Lhcgr</a>   | luteinizing hormone/choriogonadotropin receptor                              | NM_012978    | Rn00564309_m1 |
| <a href="#">Mis</a>     | anti-Mullerian Hormone                                                       | NM_012902    | Rn00563731_g1 |
| <a href="#">Ngf</a>     | nerve growth factor (beta polypeptide)                                       | XM_227525    | Rn01533872_m1 |
| <a href="#">Notch2</a>  | notch 2                                                                      | NM_024358    | Rn01534371_m1 |
| <a href="#">Nr3c1</a>   | nuclear receptor subfamily 3, group C, member 1                              | NM_012576    | Rn00561369_m1 |
| <a href="#">Ppia</a>    | peptidylprolyl isomerase A (cyclophilin A)                                   | NM_017101    | Rn00690933_m1 |
| <a href="#">Prlr</a>    | prolactin receptor                                                           | NM_012630    | Rn01525459_m1 |
| <a href="#">Pten</a>    | phosphatase and tensin homolog deleted on chr ten                            | NM_031606    | Rn00477208_m1 |
| <a href="#">Ptgs2</a>   | prostaglandin-endoperoxide synthase 2                                        | NM_017232    | Rn01483828_m1 |

Lefevre et al., Supplemental Table S1. *Continued*: Genes selected for PCR array analysis and specific to ovarian functions.

| <b>Gene Symbol</b>      | <b>Gene Name</b>                                                | <b>RefSeq NB</b> | <b>Taqman Assay</b> |
|-------------------------|-----------------------------------------------------------------|------------------|---------------------|
| <a href="#">Rarres2</a> | retinoic acid receptor responder 2                              | NM_001013427     | Rn01451853_m1       |
| <a href="#">Rxfp2</a>   | relaxin/insulin-like family peptide receptor 2                  | NM_001012475     | Rn01412901_m1       |
| <a href="#">Sohlhl1</a> | spermatogenesis and oogenesis specific basic helix-loop-helix 1 | NM_001191852.1   | Rn04280363_g1       |
| <a href="#">Spp1</a>    | secreted phosphoprotein 1                                       | NM_012881        | Rn01449972_m1       |
| <a href="#">Srd5a1</a>  | steroid-5-alpha-reductase, alpha polypeptide 1                  | NM_017070        | Rn00567064_m1       |
| <a href="#">Srd5a2</a>  | steroid-5-alpha-reductase, alpha polypeptide 2                  | NM_022711        | Rn00575595_m1       |
| <a href="#">Star</a>    | steroidogenic acute regulatory protein                          | NM_031558        | Rn00580695_m1       |
| <a href="#">Tspo</a>    | translocator protein                                            | NM_012515        | Rn00560892_m1       |

Lefevre et al., Supplemental Table S2. Fold change in gene expression relative to *Ppia* expression and the control group.

| Gene symbol             | Gene name                                                                    | Fold change relative to control |      |      |      | p value |
|-------------------------|------------------------------------------------------------------------------|---------------------------------|------|------|------|---------|
|                         |                                                                              | 0                               | 0.06 | 20   | 60   |         |
| <a href="#">Rxfp2</a>   | relaxin/insulin-like family peptide receptor 2                               | 1.00                            | 0.76 | 0.92 | 0.46 | 0.11    |
| <a href="#">Spp1</a>    | secreted phosphoprotein 1                                                    | 1.00                            | 0.70 | 1.25 | 1.39 | 0.12    |
| <a href="#">Ptgs2</a>   | prostaglandin-endoperoxide synthase 2                                        | 1.00                            | 0.80 | 0.62 | 0.63 | 0.15    |
| <a href="#">Rarres2</a> | retinoic acid receptor responder 2                                           | 1.00                            | 0.88 | 0.89 | 0.82 | 0.19    |
| <a href="#">Lhcgr</a>   | lutinizing hormone/choriogonadotropin receptor                               | 1.00                            | 0.68 | 1.07 | 0.92 | 0.20    |
| <a href="#">Tspo</a>    | translocator protein                                                         | 1.00                            | 1.22 | 0.96 | 1.04 | 0.27    |
| <a href="#">Esr1</a>    | estrogen receptor 1 (ER alpha)                                               | 1.00                            | 0.83 | 0.94 | 0.86 | 0.27    |
| <a href="#">Cmklr1</a>  | chemokine-like receptor 1                                                    | 1.00                            | 1.30 | 0.99 | 1.05 | 0.28    |
| <a href="#">Bmp7</a>    | bone morphogenetic protein 7                                                 | 1.00                            | 0.74 | 1.07 | 0.78 | 0.32    |
| <a href="#">Cyp11a1</a> | cytochrome P450, family 11, subfamily a, polypeptide 1                       | 1.00                            | 1.20 | 1.05 | 1.22 | 0.34    |
| <a href="#">Cat</a>     | catalase                                                                     | 1.00                            | 1.30 | 1.02 | 1.15 | 0.38    |
| <a href="#">Gzmb</a>    | granzyme B                                                                   | 1.00                            | 0.62 | 0.73 | 0.84 | 0.41    |
| <a href="#">Hsd17β1</a> | hydroxysteroid (17-beta) dehydrogenase 1                                     | 1.00                            | 1.14 | 1.07 | 1.16 | 0.43    |
| <a href="#">Gdf9</a>    | growth differentiation factor 9                                              | 1.00                            | 0.62 | 0.93 | 0.96 | 0.44    |
| <a href="#">Sod1</a>    | superoxide dismutase 1                                                       | 1.00                            | 1.07 | 1.11 | 1.12 | 0.45    |
| <a href="#">Ngf</a>     | nerve growth factor (beta polypeptide)                                       | 1.00                            | 0.91 | 0.87 | 0.80 | 0.47    |
| <a href="#">Casp2</a>   | caspase 2                                                                    | 1.00                            | 0.91 | 1.00 | 0.98 | 0.48    |
| <a href="#">Arh</a>     | aryl hydrocarbon receptor                                                    | 1.00                            | 1.15 | 0.96 | 1.04 | 0.59    |
| <a href="#">Bmp4</a>    | bone morphogenetic protein 4                                                 | 1.00                            | 1.08 | 0.88 | 0.82 | 0.60    |
| <a href="#">Bax</a>     | bcl2-associated X protein                                                    | 1.00                            | 0.91 | 0.95 | 0.88 | 0.60    |
| <a href="#">Srd5a1</a>  | steroid-5-alpha-reductase, alpha polypeptide 1                               | 1.00                            | 0.82 | 0.76 | 0.80 | 0.62    |
| <a href="#">Cx43</a>    | gap junction protein, alpha 1                                                | 1.00                            | 1.07 | 1.00 | 0.87 | 0.65    |
| <a href="#">Cyp19</a>   | aromatase                                                                    | 1.00                            | 1.19 | 1.12 | 1.25 | 0.68    |
| <a href="#">Fshr</a>    | follicle stimulating hormone receptor                                        | 1.00                            | 0.91 | 1.09 | 0.86 | 0.73    |
| <a href="#">Lfng</a>    | O-fucosylpeptide 3-beta-N-acetylglucosaminyltransferase                      | 1.00                            | 0.90 | 0.88 | 0.89 | 0.74    |
| <a href="#">Igf1</a>    | insulin-like growth factor                                                   | 1.00                            | 0.91 | 1.08 | 0.94 | 0.76    |
| <a href="#">Mis</a>     | anti-Mullerian Hormone                                                       | 1.00                            | 0.75 | 0.86 | 0.93 | 0.76    |
| <a href="#">Hsd3β1</a>  | hydroxy-delta-5-steroid dehydrogenase, 3 beta- and steroid delta-isomerase 1 | 1.00                            | 1.15 | 1.10 | 1.16 | 0.77    |
| <a href="#">Foxo3a</a>  | forkhead box O3                                                              | 1.00                            | 0.87 | 0.96 | 0.96 | 0.78    |
| <a href="#">Esr2</a>    | estrogen receptor 2 (ER beta)                                                | 1.00                            | 0.90 | 1.01 | 0.91 | 0.78    |
| <a href="#">Ar</a>      | androgen receptor                                                            | 1.00                            | 0.92 | 0.93 | 0.97 | 0.80    |

Lefevre et al., Supplemental Table S2. *Continued*: Fold change in gene expression relative to *Ppia* expression and the control group.

| Gene symbol                   | Gene name                                                       | Fold change relative to control |      |      |      | p value |
|-------------------------------|-----------------------------------------------------------------|---------------------------------|------|------|------|---------|
|                               |                                                                 | 0                               | 0.06 | 20   | 60   |         |
| <a href="#"><i>Bcl2</i></a>   | B-cell CLL/lymphoma 2                                           | 1.00                            | 0.88 | 0.93 | 0.90 | 0.81    |
| <a href="#"><i>Arnt</i></a>   | aryl hydrocarbon receptor nuclear translocator                  | 1.00                            | 0.92 | 0.94 | 0.94 | 0.82    |
| <a href="#"><i>Notch2</i></a> | notch 2                                                         | 1.00                            | 0.91 | 0.98 | 0.90 | 0.84    |
| <a href="#"><i>Ccnd2</i></a>  | cyclin D2                                                       | 1.00                            | 1.03 | 0.98 | 1.03 | 0.88    |
| <a href="#"><i>Star</i></a>   | steroidogenic acute regulatory protein                          | 1.00                            | 1.00 | 1.12 | 1.06 | 0.90    |
| <a href="#"><i>Nr3c1</i></a>  | nuclear receptor subfamily 3, group C, member 1                 | 1.00                            | 0.96 | 0.97 | 0.96 | 0.90    |
| <a href="#"><i>Gzma</i></a>   | granzyme A                                                      | 1.00                            | 1.00 | 0.84 | 0.93 | 0.93    |
| <a href="#"><i>Kitlg</i></a>  | KIT ligand                                                      | 1.00                            | 0.94 | 0.91 | 0.91 | 0.93    |
| <a href="#"><i>Pten</i></a>   | phosphatase and tensin homolog deleted on chr ten               | 1.00                            | 1.03 | 1.00 | 0.99 | 1.00    |
| <a href="#"><i>Prlr</i></a>   | prolactin receptor                                              | 1.00                            | 1.02 | 0.99 | 1.00 | 1.00    |
| <a href="#"><i>Sohlh1</i></a> | spermatogenesis and oogenesis specific basic helix-loop-helix 1 | 1.00                            | 1.00 | 1.00 | 1.01 | 1.00    |

**Lefevre et al., Supplemental Table S3. Reproductive Parameters (adapted from [29]).**

| Parameter                         | Nominal BFR Mixture Dose (mg/kg/day) |                 |                  |                 |
|-----------------------------------|--------------------------------------|-----------------|------------------|-----------------|
|                                   | Control (0)                          | 0.06            | 20               | 60              |
| Estrous cycle length - days       | 4.8 ± 0.4 (31)                       | 4.6 ± 0.3 (29)  | 4.7 ± 0.2 (29)   | 5.6 ± 0.6 (29)  |
| Mating Index <sup>a</sup>         | 70.4 (27)                            | 85.2 (27)       | 75.0 (24)        | 70.8 (24)       |
| Fecundity index <sup>b</sup>      | 79.0 (15)                            | 91.3 (21)       | 94.4 (17)        | 100.0 (17)      |
| Number of live fetuses per litter | 17.0 ± 0.3 (15)                      | 17.4 ± 0.4 (21) | 16.8 ± 0.80 (17) | 16.7 ± 0.9 (17) |
| Mean placental weights (mg)       | 477.0 ± 10.5                         | 470.4 ± 9.6     | 464.6 ± 14.2     | 494.4 ± 21.7    |

*Values are expressed as means ± SEM with the total number of observations in parentheses.*

<sup>a</sup>*Mating index = (number of sperm positive females / number of mated females) x 100.*

<sup>b</sup>*Fecundity index = (number of pregnant females / number of sperm positive females) x 100.*
